# Supplementary material for: Viable production of hydrogen and methane from polluted water using eco-friendly plasmonic Pd–TiO2 nanocomposites
Source: Royal Society of Chemistry journal article supplement (doi:10.1039/d2ra07442g), 2023-01-01
Supplement: d2ra07442g1.pdf [file d2ra07442g1.pdf]

### Supplementary information file (S1)

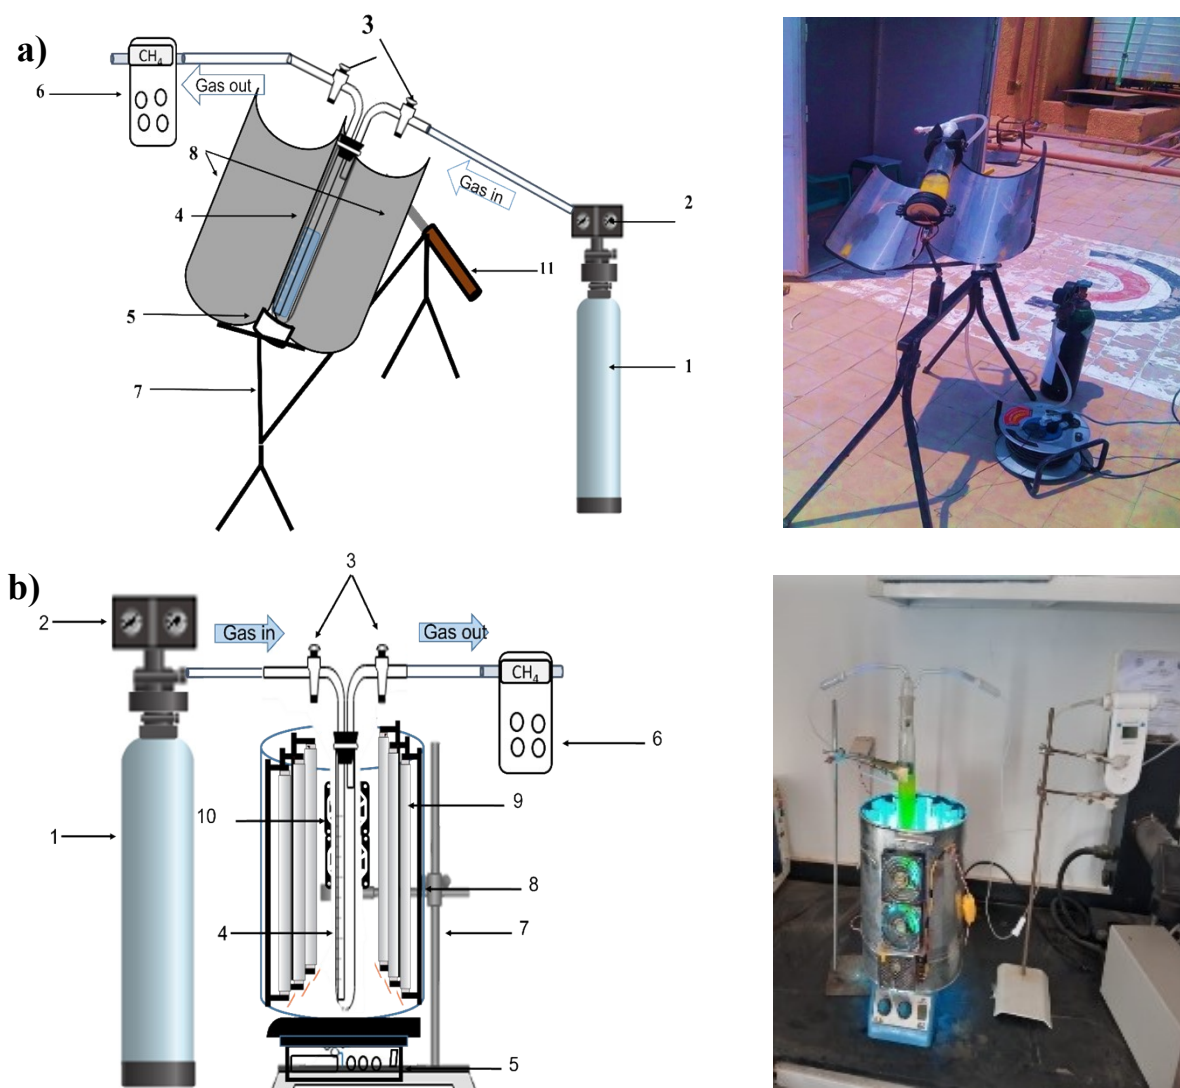

**Fig. (S1)** A schematic diagram of a) lab-scale UV-reactor; b) proto-type solar photobiogas reactors: 1-Nitrogen cylinder, 2- Gas pressure regulator, 3- Gas Faucet, 4- Reaction tube, 5- the magnetic stirrer, 6- Outgoing gas meter (CH<sub>4</sub>, H<sub>2</sub> detector), 7- Holder, 8- Reflective cylinder made of stainless steel, 9- Ultraviolet light bulbs, 10- Cooling fan and 11- Sun tracker stick.
